# Supplementary material for: Eph/ephrin interactions modulate muscle satellite cell motility and patterning
Source: Oxford University Press journal article supplement (doi:10.1242/dev.068411), 2011-11-10

**Table S1. Results of three biological replicate experiments showing the fraction of primary satellite cells (syndecan-4 positive) that co-express each Eph and ephrin by flow cytometry**

| Antibody | Run #1 | Run #2 | Run #3 | Average | Standard deviation |
|----------|--------|--------|--------|---------|--------------------|
| EphrinA1 | 74.0%  | 93.3%  | 97.4%  | 88.2%   | 12.5%              |
| EphrinA2 | 96.1%  | 99.1%  | 79.1%  | 91.4%   | 10.8%              |
| EphrinA3 | 94.7%  | 98.3%  | 97.9%  | 97.0%   | 2.0%               |
| EphrinA4 | 11.7%  | 1.2%   | 6.3%   | 6.4%    | 5.3%               |
| EphrinA5 | 38.9%  | 69.9%  | 78.3%  | 62.4%   | 20.8%              |
| EphrinB1 | 97.5%  | 99.3%  | 98.6%  | 98.5%   | 0.9%               |
| EphrinB2 | 1.6%   | 1.4%   | 1.3%   | 1.4%    | 0.2%               |
| EphrinB3 | 19.80% | 11.10% | 6.90%  | 12.60%  | 6.58%              |
| EPHA1    | 22.0%  | 48.9%  | 67.5%  | 46.1%   | 22.9%              |
| EPHA2    | 98.2%  | 99.6%  | 95.6%  | 97.8%   | 2.0%               |
| EPHA3    | 58.1%  | 79.5%  | 11.0%  | 49.5%   | 35.0%              |
| EPHA4    | 5.3%   | 1.0%   | 1.0%   | 2.4%    | 2.5%               |
| EPHA5    | 1.6%   | 0.6%   | 0.8%   | 1.0%    | 0.5%               |
| EPHA6    | 1.30%  | 10.20% | 4.70%  | 5.40%   | 4.49%              |
| EPHA7    | 1.7%   | 3.9%   | 1.3%   | 2.3%    | 1.4%               |
| EPHA8    | 3.0%   | 5.6%   | 6.2%   | 4.9%    | 1.7%               |
| EPHB1    | 93.4%  | 99.5%  | 99.3%  | 97.4%   | 3.5%               |
| EPHB2    | 91.3%  | 80.8%  | 97.0%  | 89.7%   | 8.2%               |
| EPHB3    | 14.40% | 11.00% | 5.10%  | 10.17%  | 4.71%              |
| EPHB4    | 69.7%  | 70.6%  | 81.6%  | 74.0%   | 6.6%               |
| EPHB6    | 42.1%  | 12.2%  | 82.3%  | 45.5%   | 35.2%              |

Close peaks defined as  $\geq 20\%$  standard deviation.

Ephrin-A2= RB488 and FL1-H  
Syndecan-4 = CH633 and FL4-H

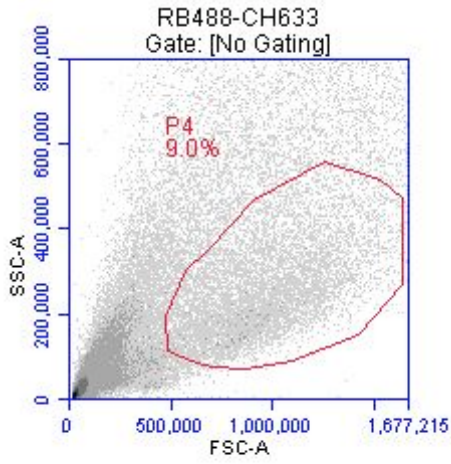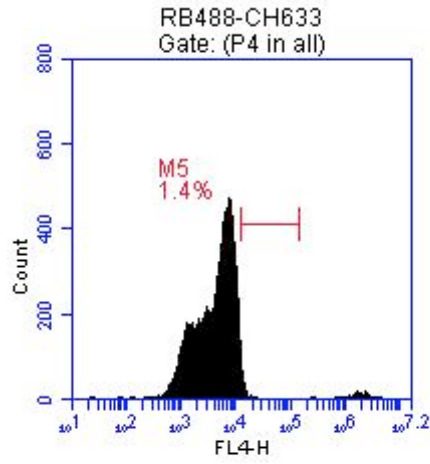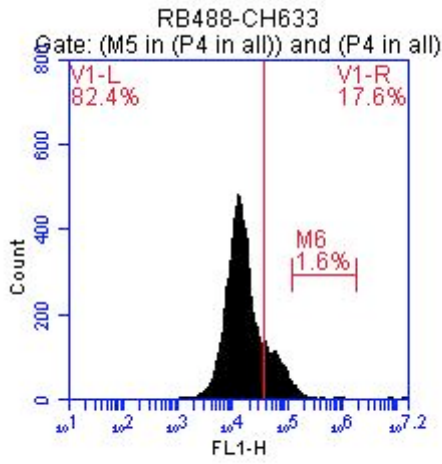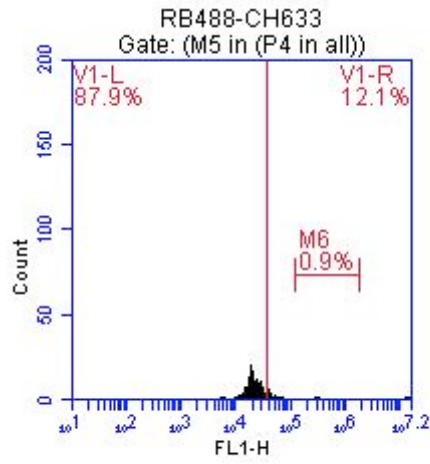

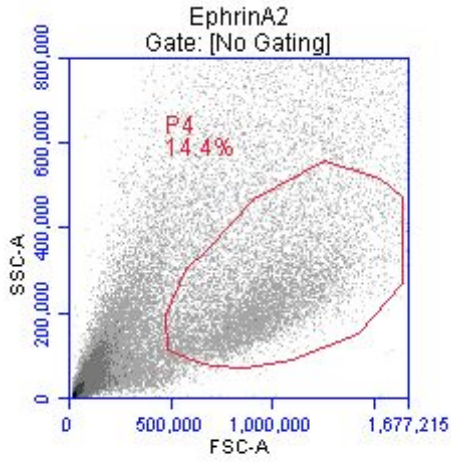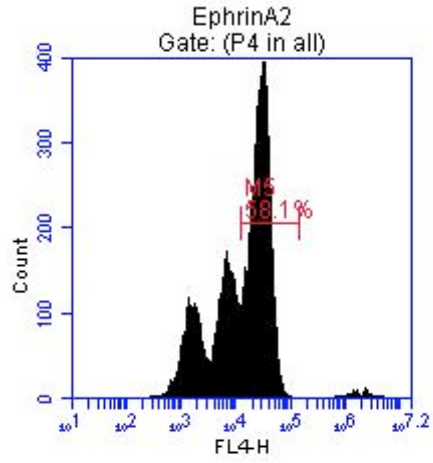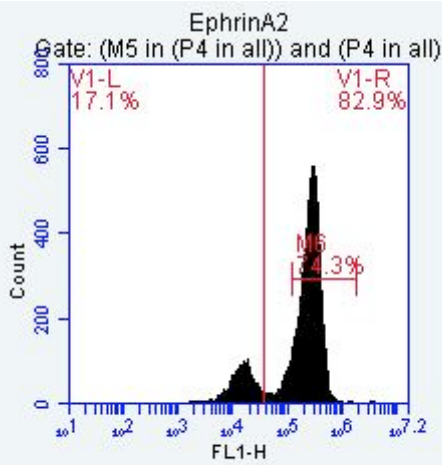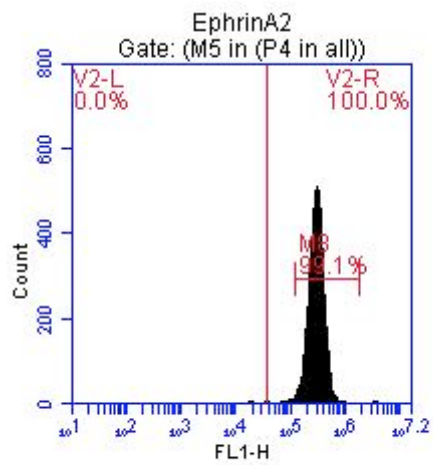

Supplement: dev068411tables1.pdf [file dev068411tables1.pdf]
